# Supplementary material for: Transimination reactions in [b-3C-im][NTf2] ionic liquid
Source: Royal Society of Chemistry journal article supplement (doi:10.1039/c0ob01094d), 2011-01-01

**Transimination reactions in [b-3C-im][NTf<sub>2</sub>] ionic liquid†**

Chao-Wen Chen, Ming-Chung Tseng, San-Kai Hsiao, Wen-Hao Chen and Yen-Ho Chu\*

Department of Chemistry and Biochemistry

National Chung Cheng University

168 University Road, Chia-Yi 62102, Taiwan, ROC

\* Corresponding author. Telephone: +886-5-242-8148; Fax: +886-5-272-1040; E-mail: cheyh@ccu.edu.tw

**Fig. S1** Transimination reaction of imines **1** (15 mM) with isopropylamine (15 mM) in DMSO-*d*<sub>6</sub> at ambient temperature.

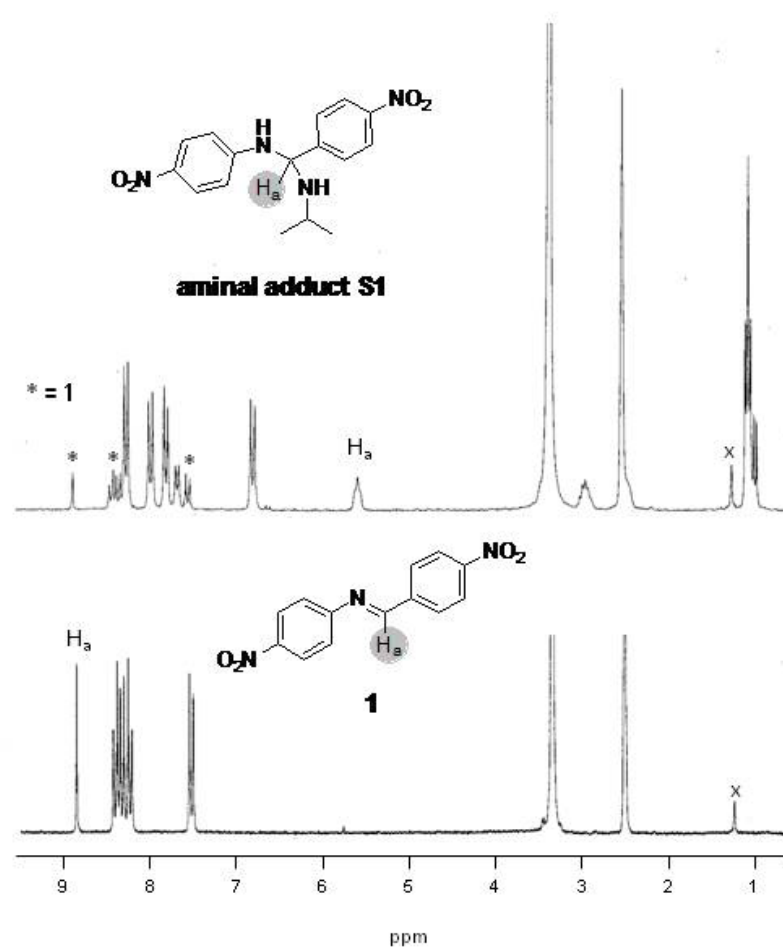

**Fig. S2** Transimination reaction of imines **1** (15 mM) with isopropylamine (15 mM) in methanol-*d*<sub>4</sub> at ambient temperature.

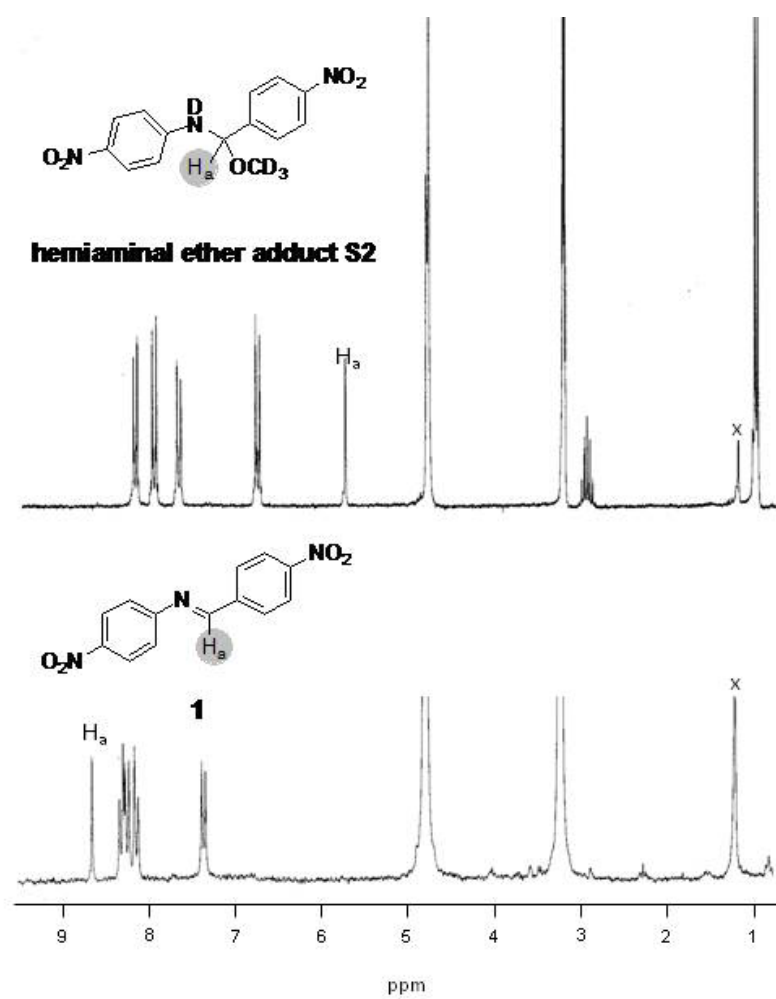

**Fig. S3**  $^1\text{H}$  NMR spectra of [b-3C-im][NTf<sub>2</sub>] and [b-3C-im][Br] ionic liquids in CDCl<sub>3</sub> at ambient temperature.

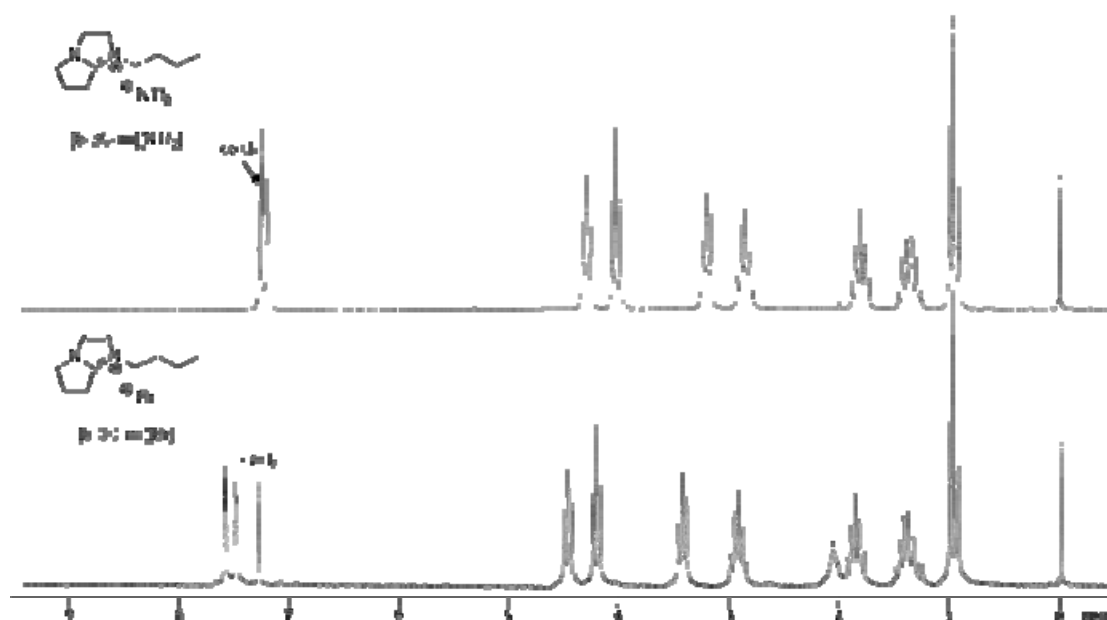

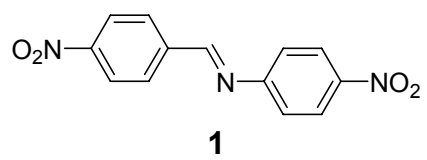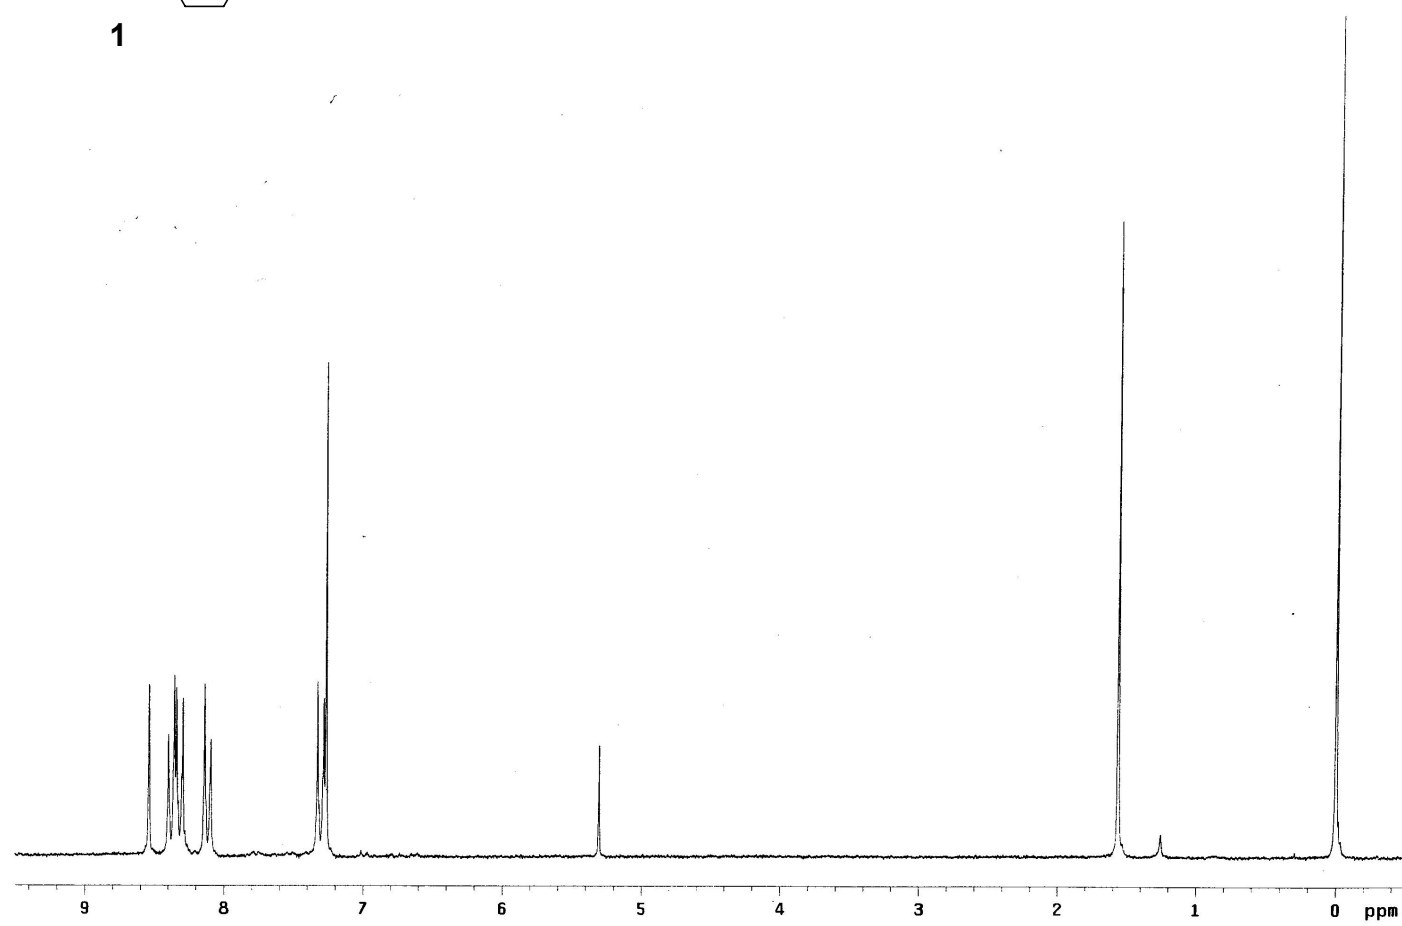

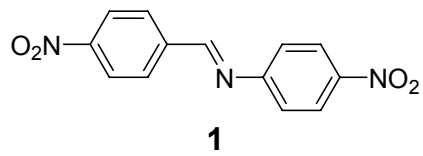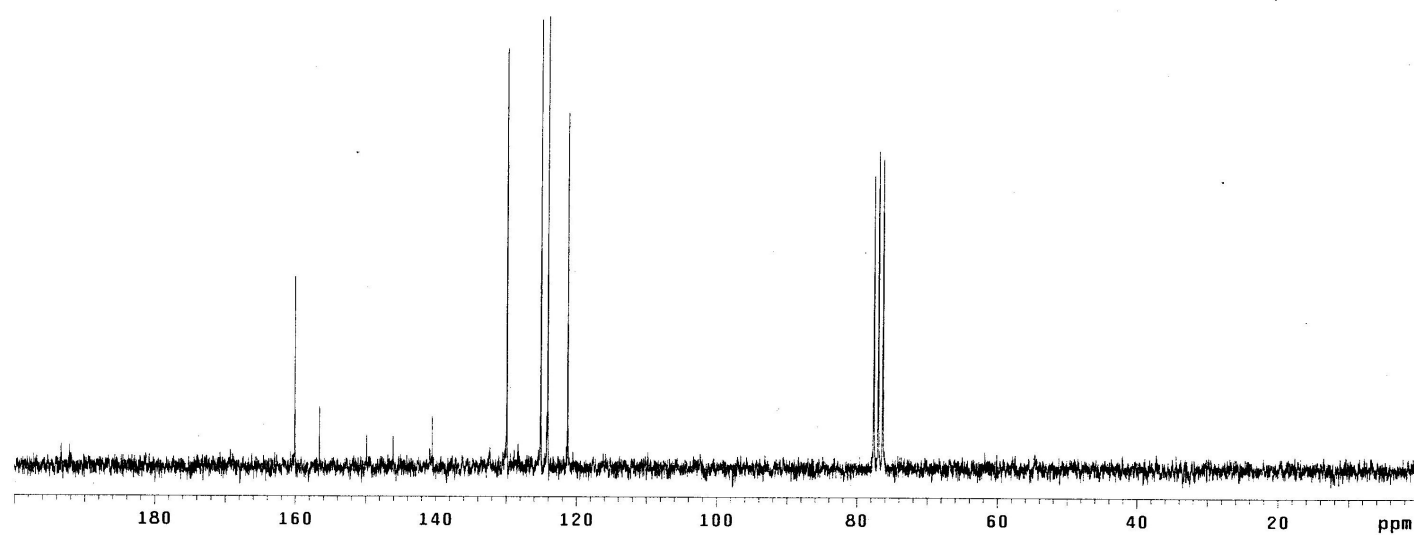

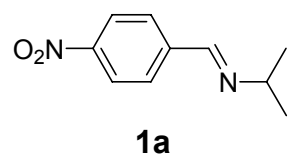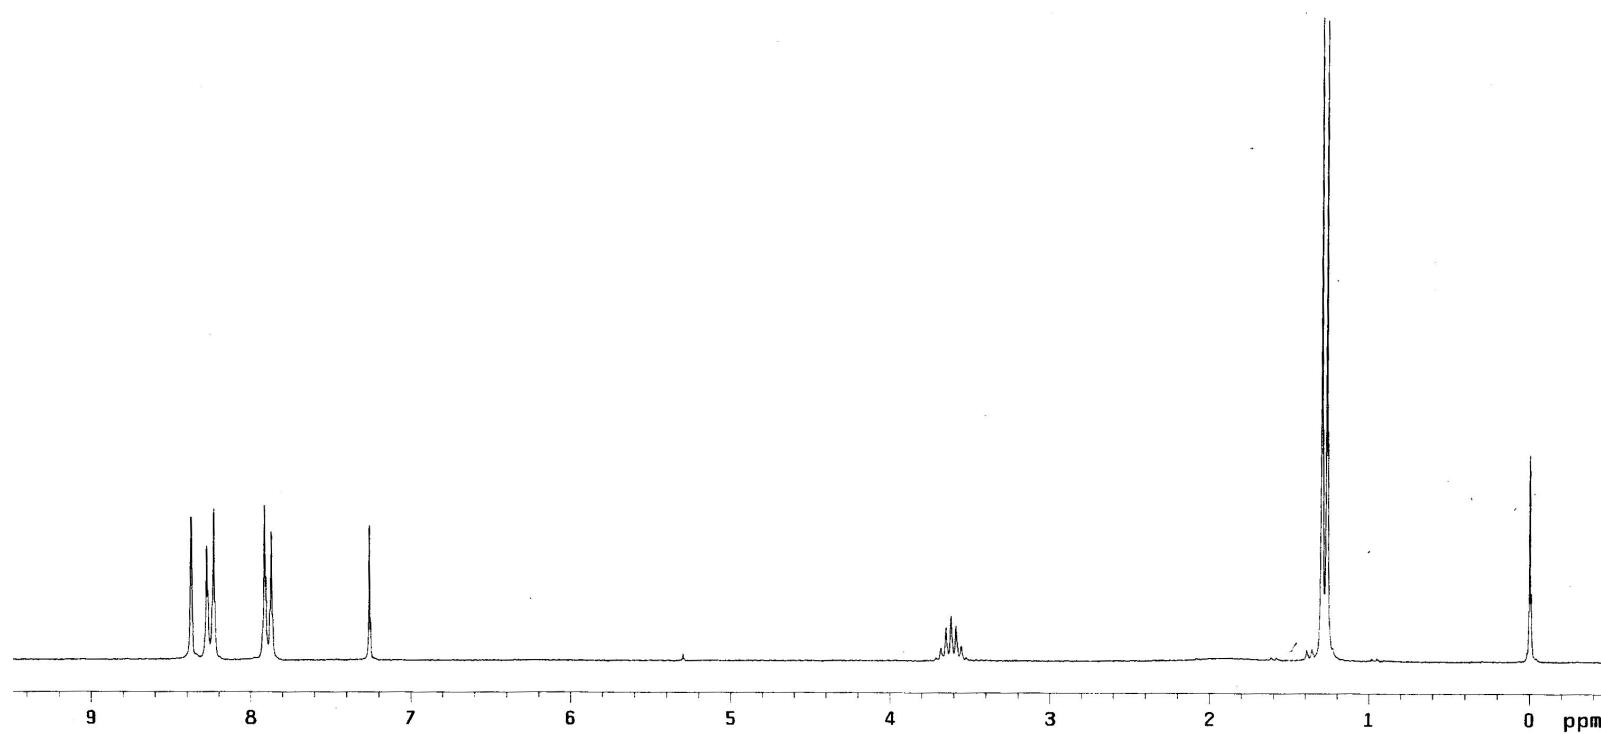

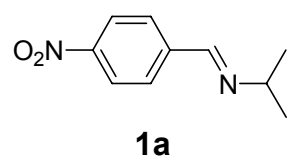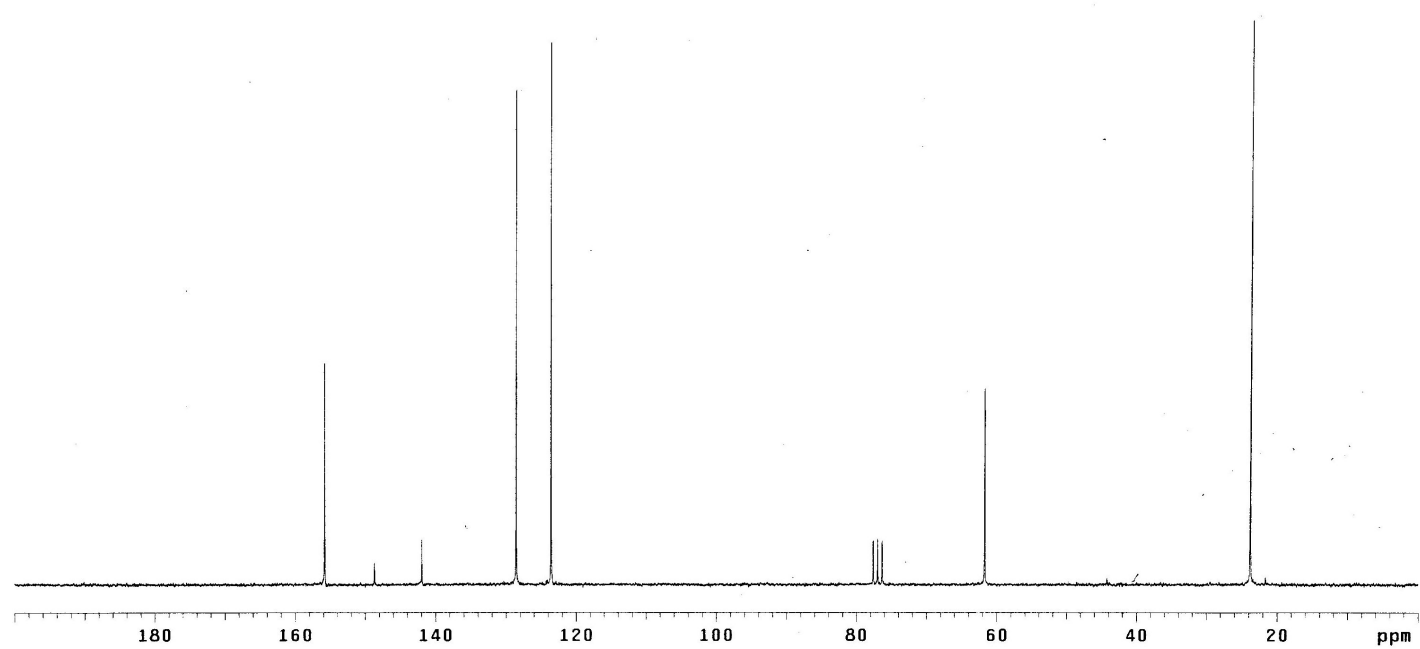



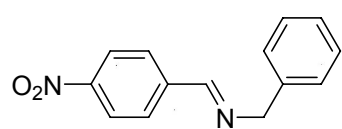

**1b**

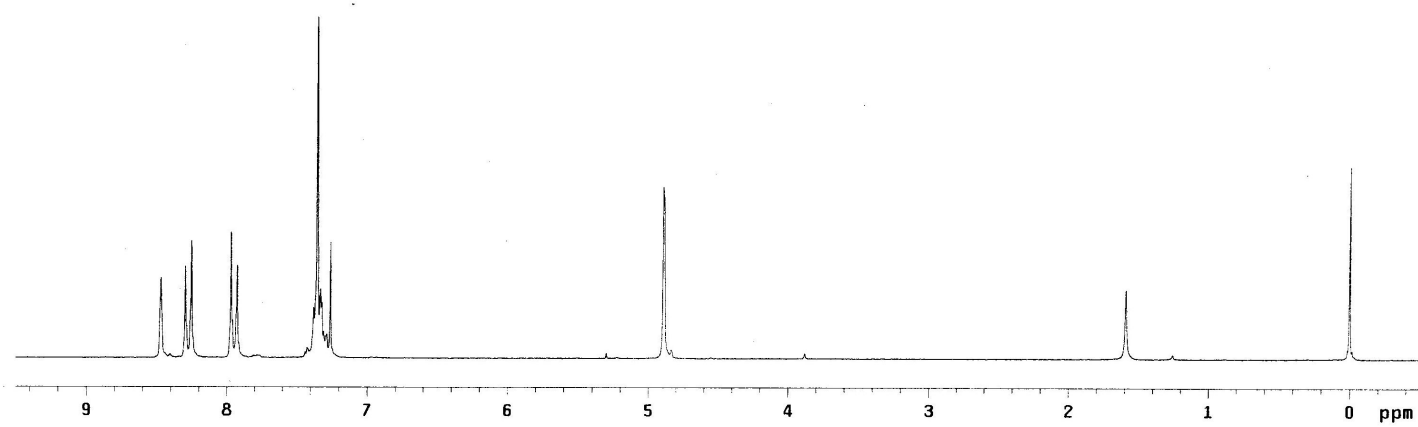

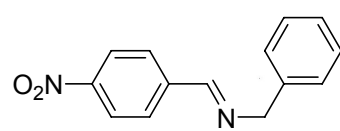

**1b**

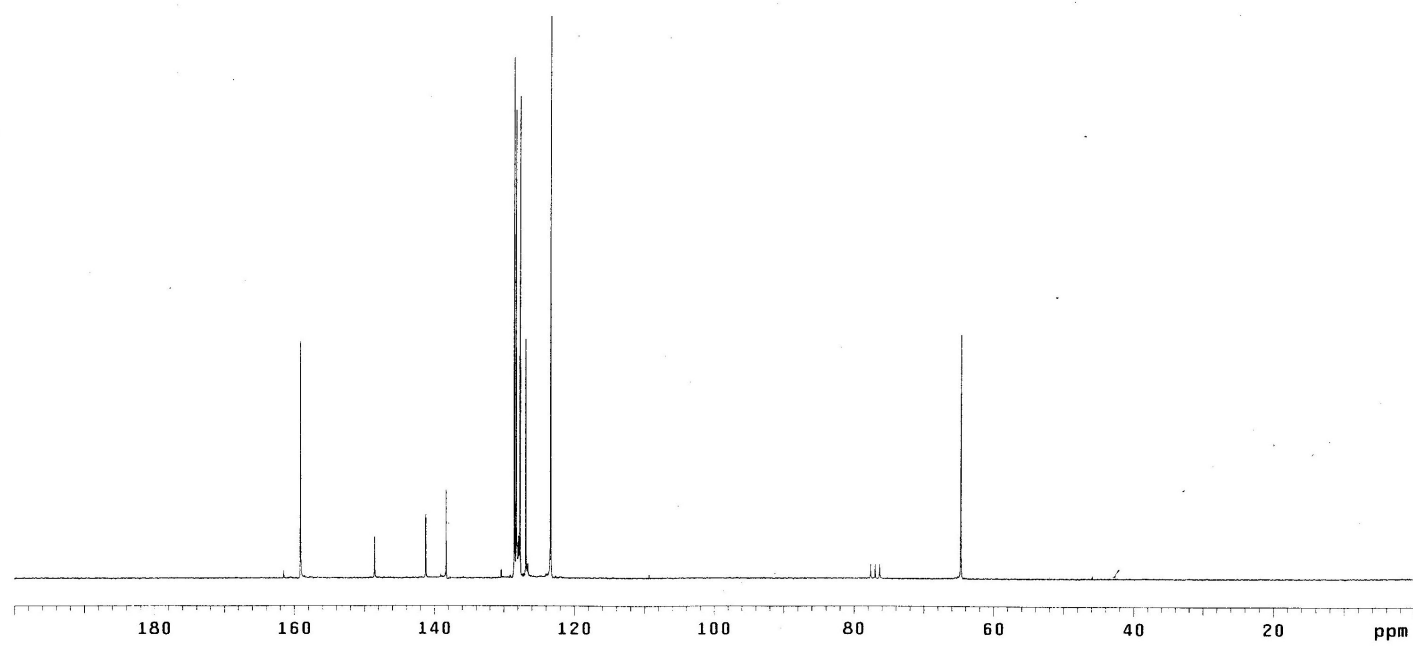

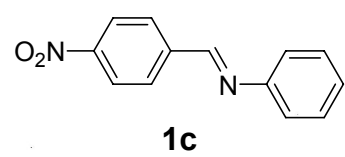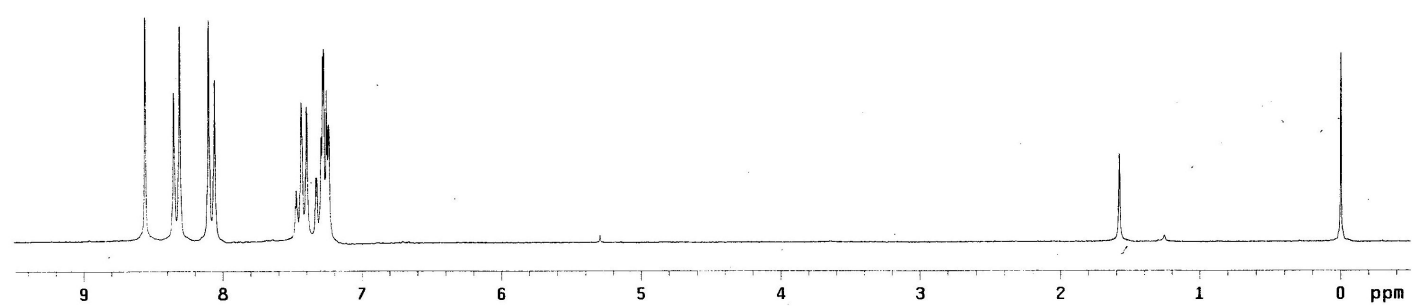

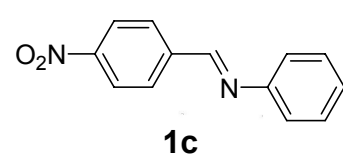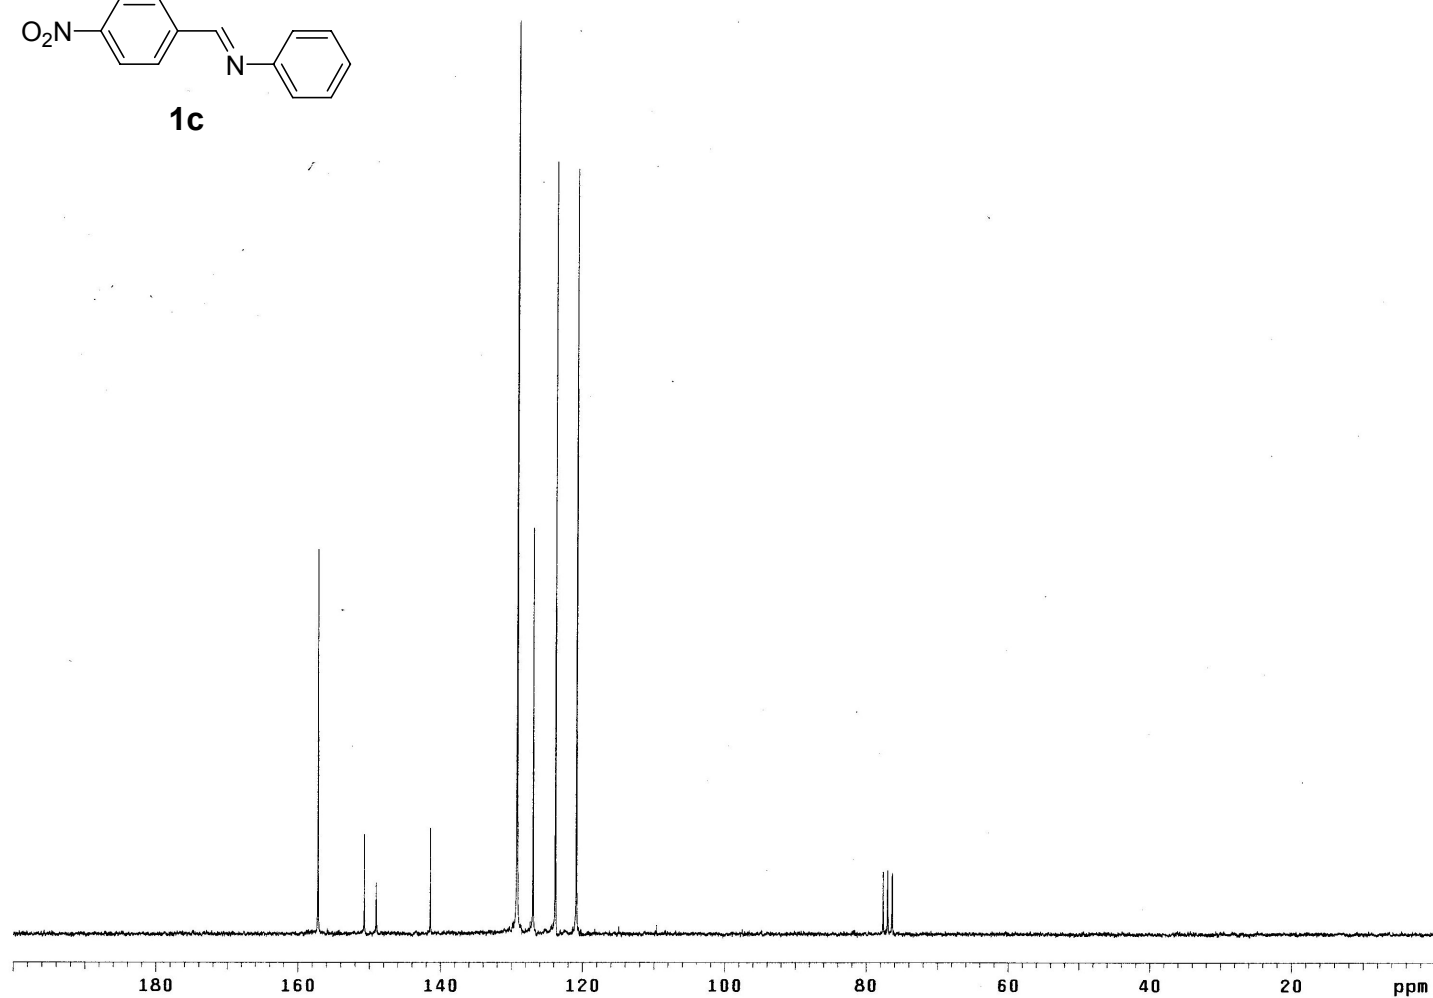

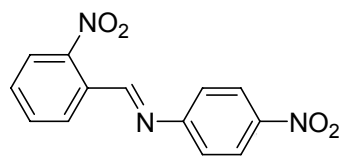

**2**

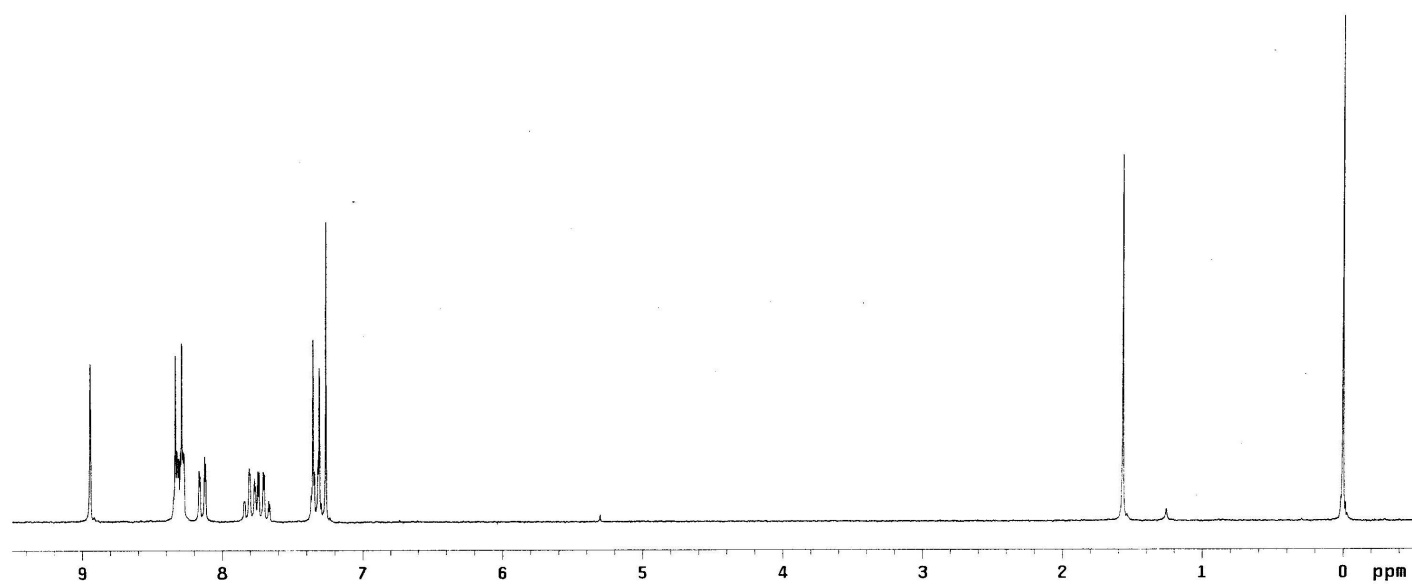

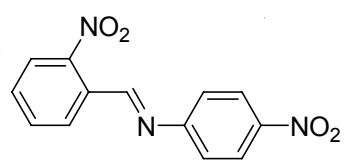

**2**

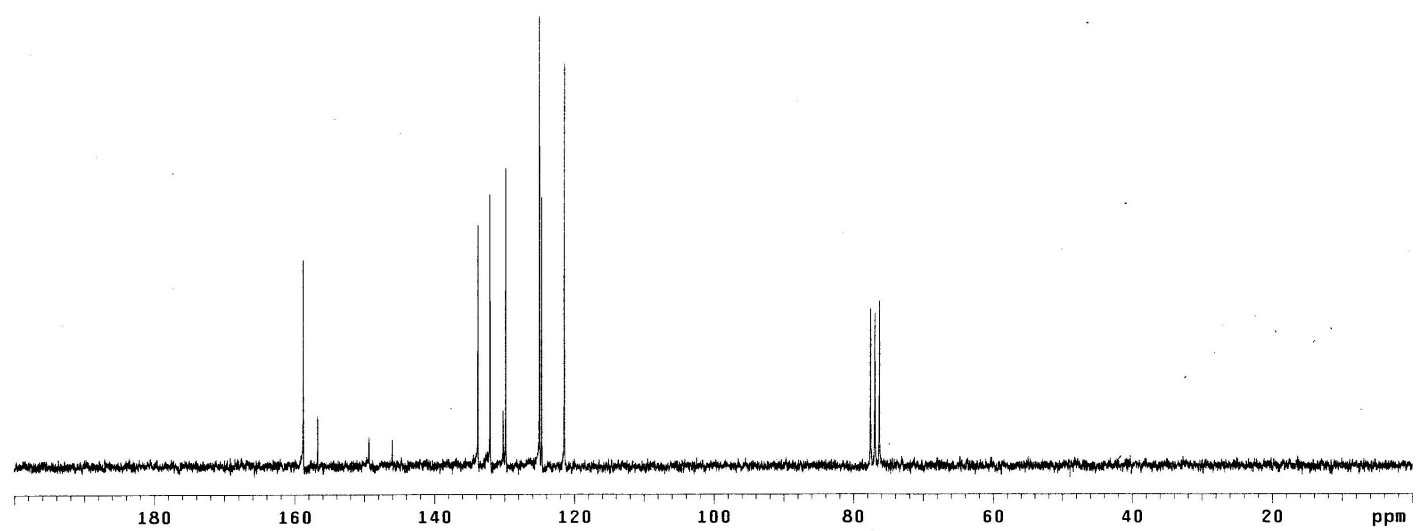

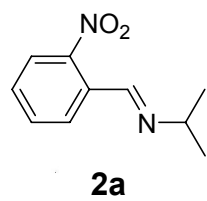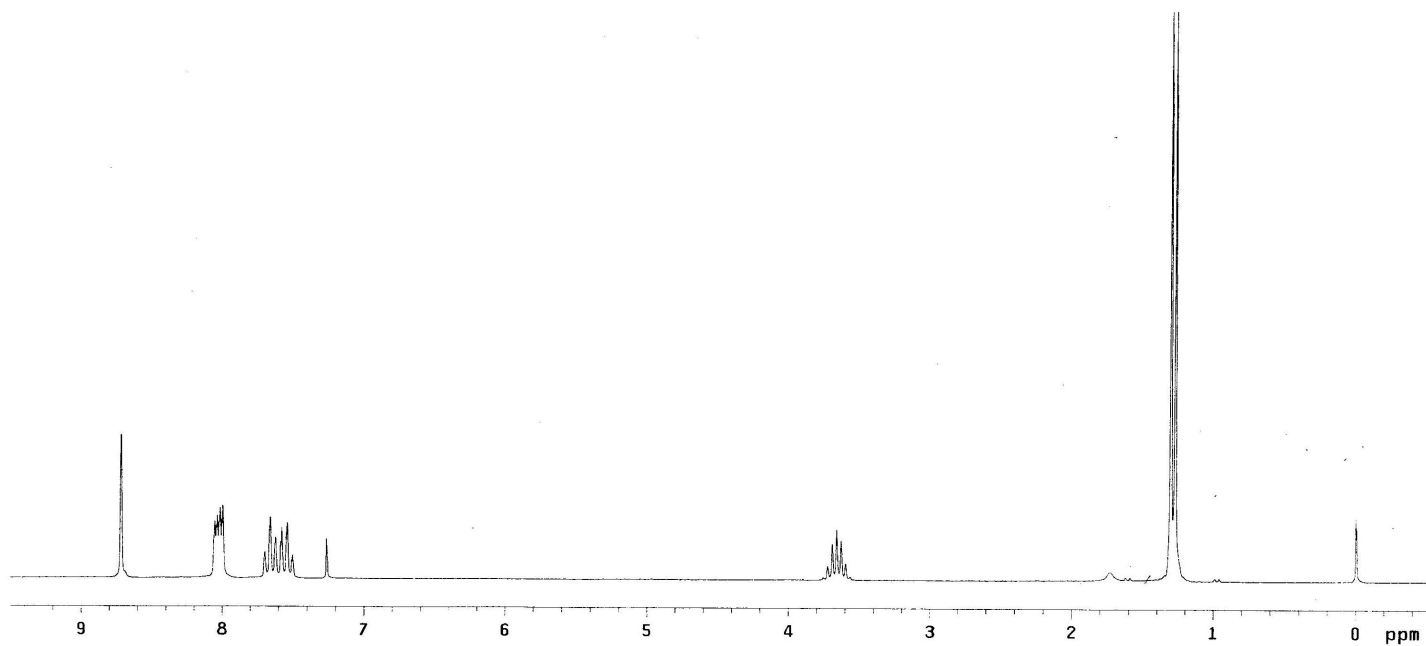

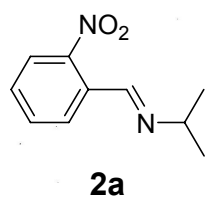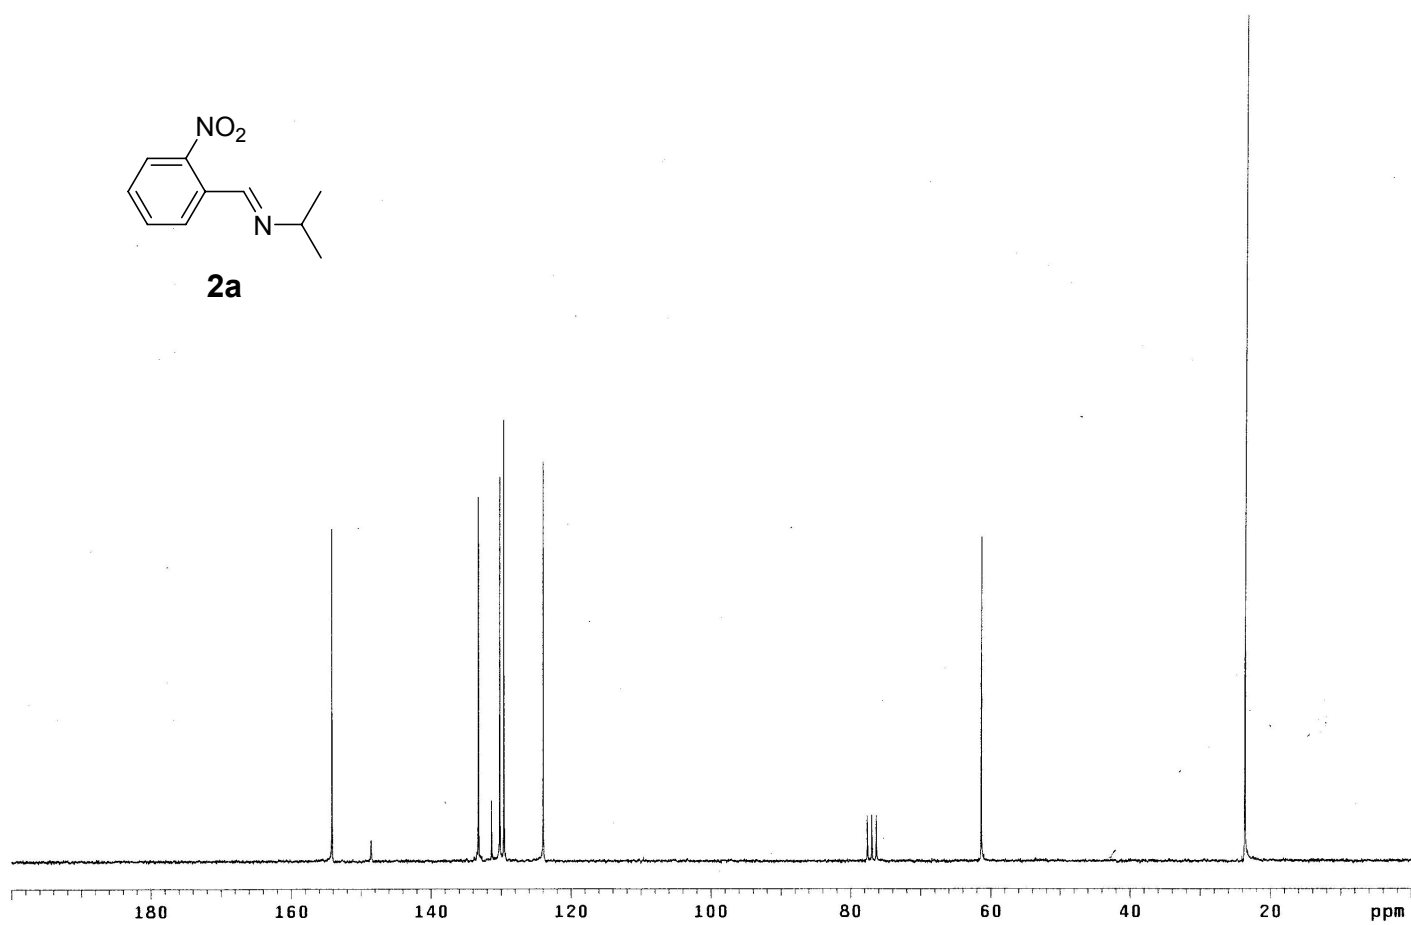



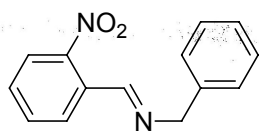

**2b**

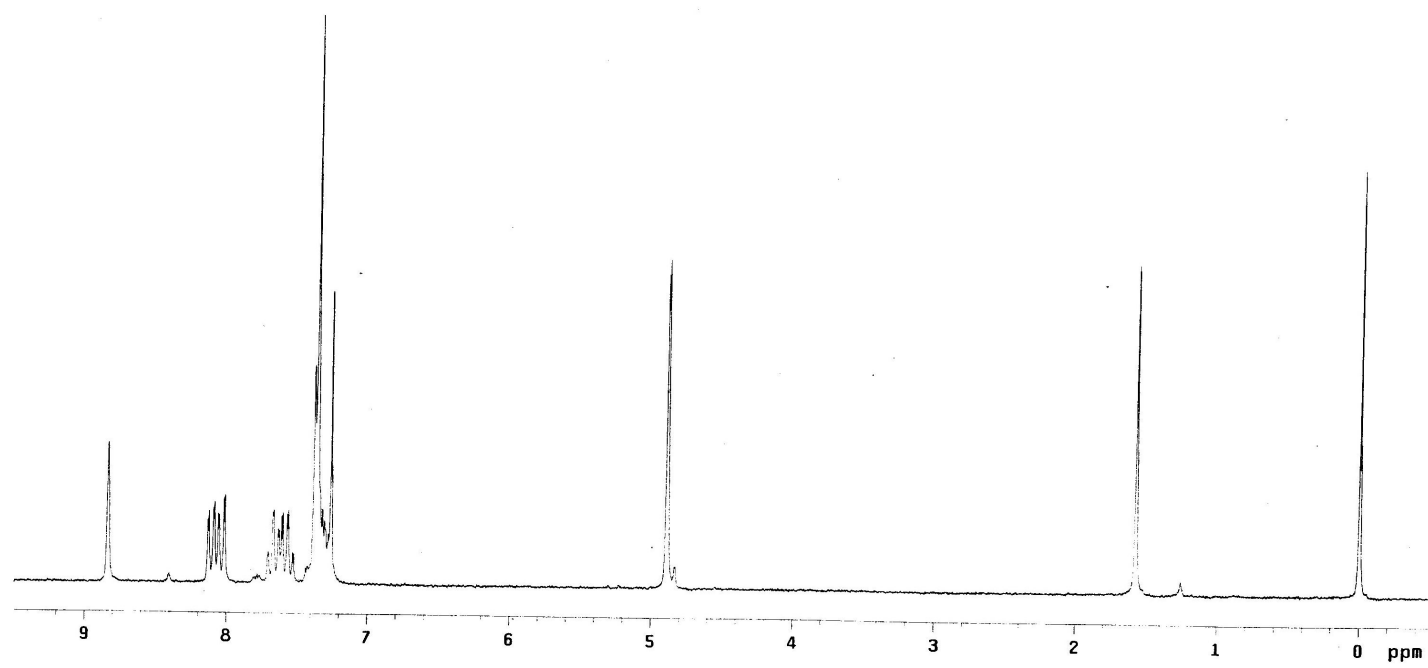

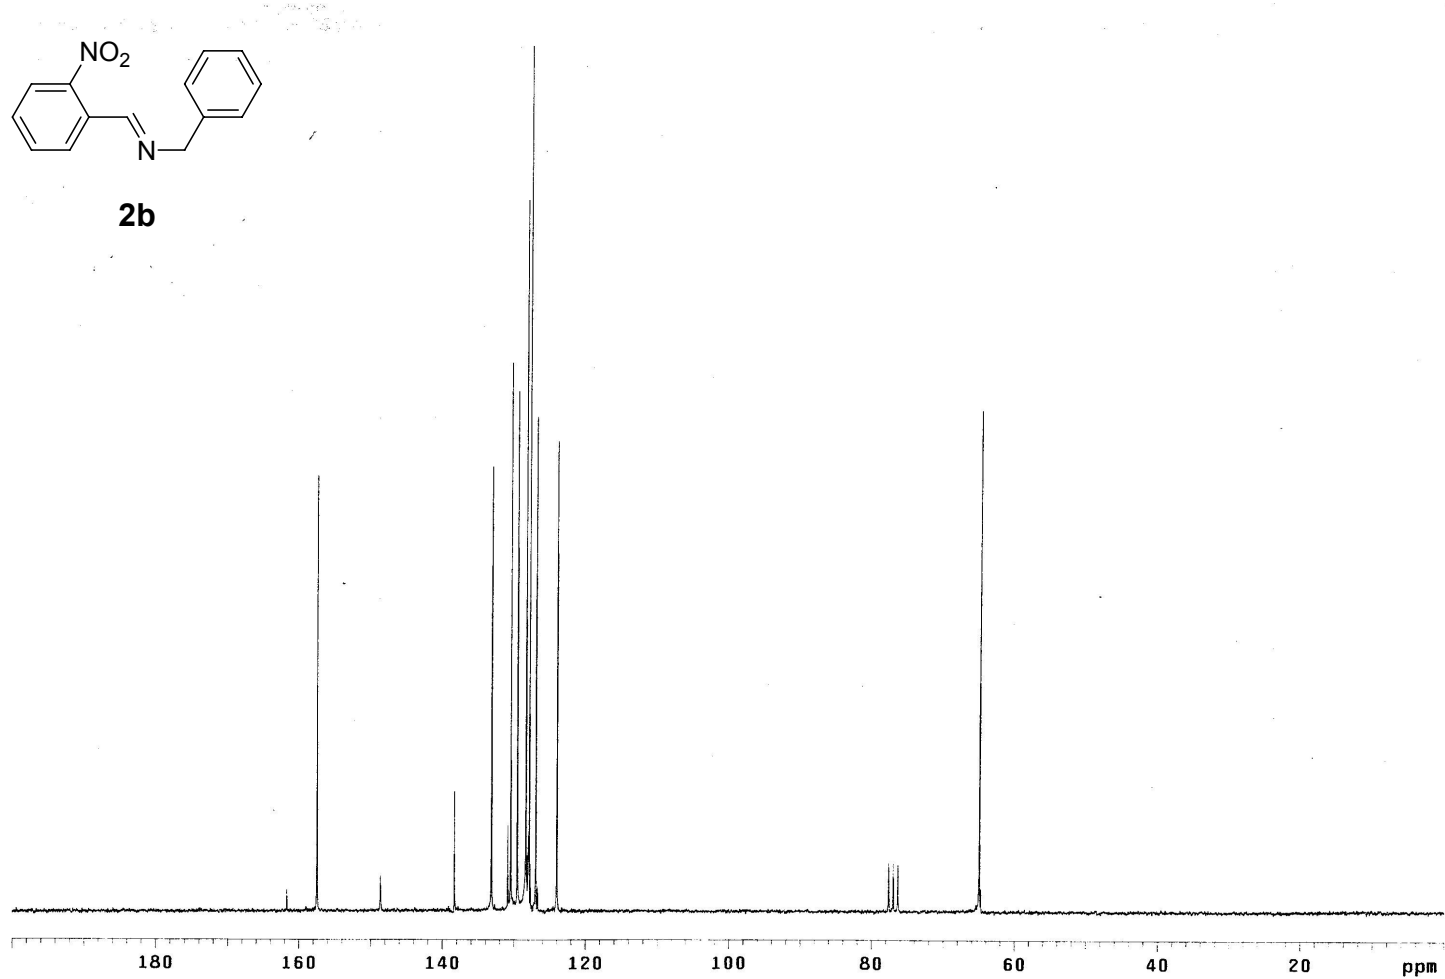

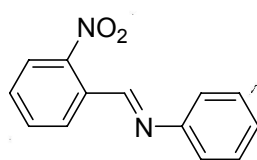

**2c**

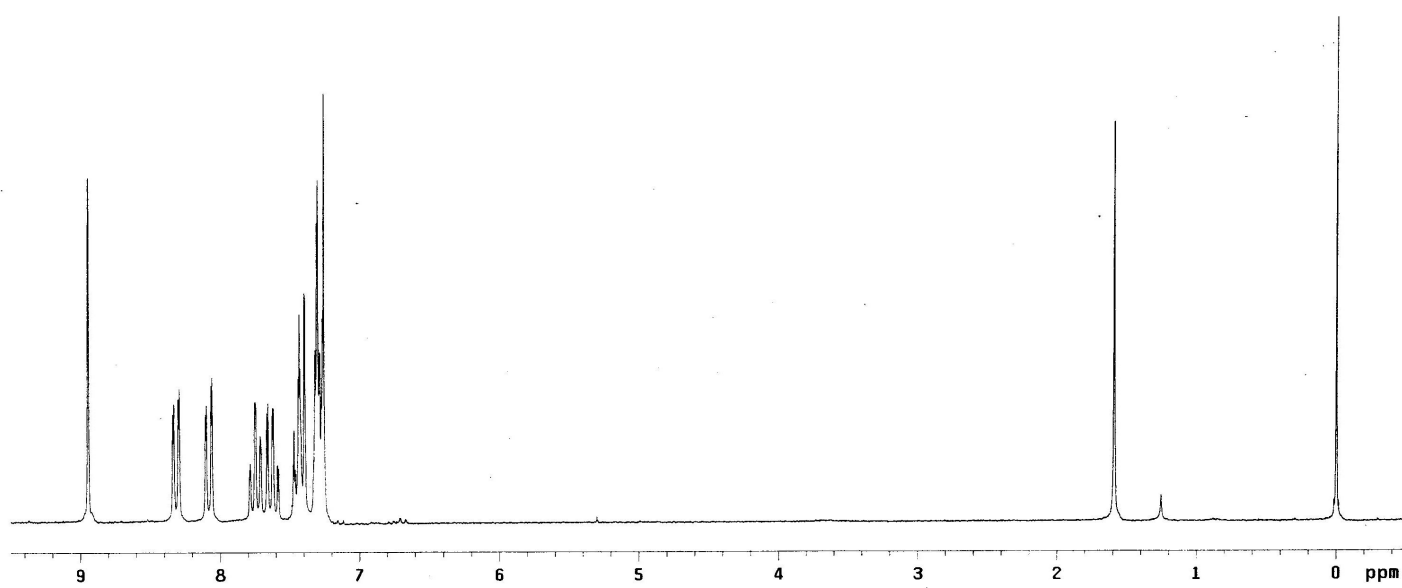

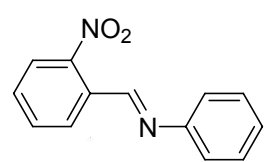

**2c**

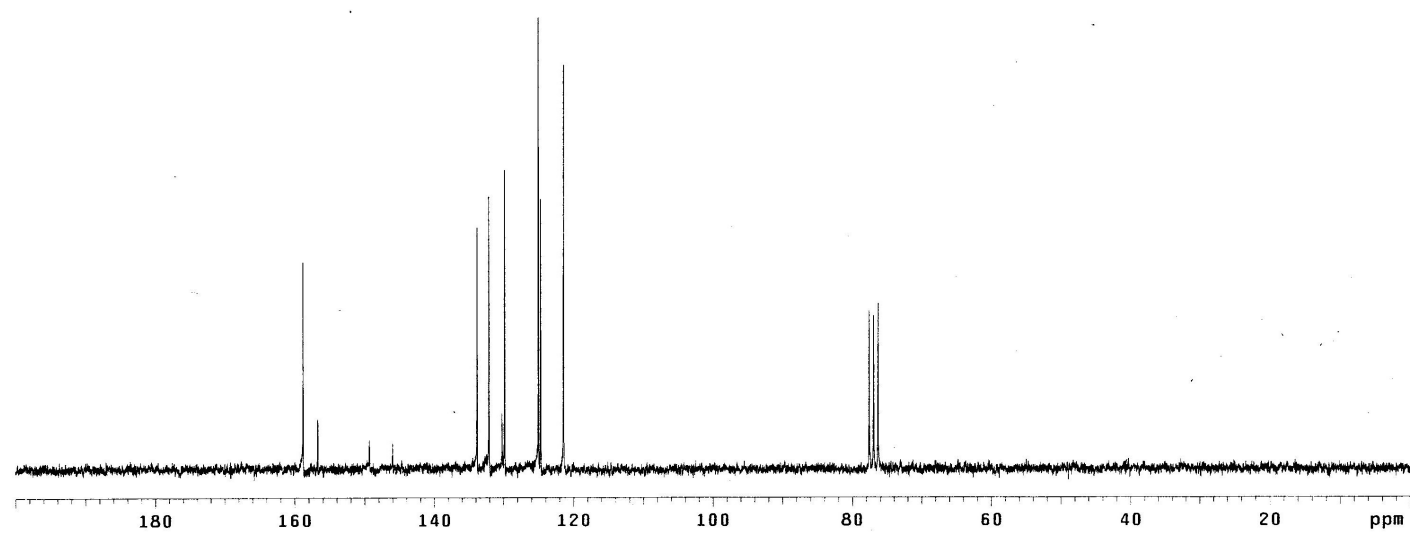

Supplement: c0ob01094d.pdf [file c0ob01094d.pdf]
